# Supplementary material
Source: HighWire-hosted journal article supplement (https://gut.bmj.com/content/66/4/620)
Supplement: inline-supplementary-material-3 [file inline-supplementary-material-3.pdf]

**Table S2 : Genera significantly enriched or depleted in WT-HFD mice compared to WT-CT.**

| Species                    | p       | WT-CT  |       | WT-HFD |       |
|----------------------------|---------|--------|-------|--------|-------|
|                            |         | Mean   | SEM   | Mean   | SEM   |
| <i>Allobaculum</i>         | 0,00117 | 14,757 | 3,565 | 1,389  | 0,407 |
| <i>Anaeroplasma</i>        | 0,00008 | 14,457 | 2,638 | 1,633  | 0,347 |
| <i>Bacteroides</i>         | 0,00353 | 0,368  | 0,058 | 1,122  | 0,223 |
| <i>c__OClostridia</i>      | 0,00000 | 0,104  | 0,021 | 0,711  | 0,084 |
| <i>Clostridium</i>         | 0,03889 | 0,014  | 0,005 | 0,002  | 0,001 |
| <i>Coprococcus</i>         | 0,01274 | 0,255  | 0,052 | 0,107  | 0,014 |
| <i>Dorea</i>               | 0,01373 | 0,022  | 0,007 | 0,054  | 0,010 |
| <i>f__OLachnospiraceae</i> | 0,02615 | 0,051  | 0,014 | 0,094  | 0,011 |
| <i>f__ORuminococcaceae</i> | 0,00000 | 0,183  | 0,023 | 0,742  | 0,085 |
| <i>f__Lachnospiraceae</i>  | 0,00965 | 1,124  | 0,129 | 1,659  | 0,138 |
| <i>f__Peptococcaceae</i>   | 0,00001 | 0,032  | 0,006 | 0,325  | 0,050 |
| <i>f__Rikenellaceae</i>    | 0,00000 | 7,699  | 1,147 | 21,063 | 1,810 |
| <i>f__Ruminococcaceae</i>  | 0,00001 | 0,790  | 0,144 | 3,240  | 0,394 |
| <i>f__S24-7</i>            | 0,02158 | 5,356  | 1,150 | 2,481  | 0,167 |
| <i>k__Bacteria</i>         | 0,02062 | 0,002  | 0,001 | 0,011  | 0,004 |
| <i>o__OBacteroidales</i>   | 0,01063 | 0,039  | 0,006 | 0,069  | 0,009 |
| <i>o__Clostridiales</i>    | 0,03448 | 24,387 | 2,759 | 33,068 | 2,687 |
| <i>o__RF32</i>             | 0,01817 | 1,744  | 0,629 | 0,127  | 0,073 |
| <i>Odoribacter</i>         | 0,00222 | 1,646  | 0,261 | 2,765  | 0,191 |
| <i>Oscillospira</i>        | 0,00005 | 3,743  | 0,657 | 9,684  | 0,984 |
| <i>Ruminococcus</i>        | 0,00782 | 0,299  | 0,062 | 1,902  | 0,544 |
| <i>Sutterella</i>          | 0,01391 | 2,212  | 0,794 | 0,086  | 0,057 |

Data are shown as the means and SEM. Significant differences ( $P < 0.05$ ) between the two groups are indicated. P values are based on the 2-sample t-test assuming equal variances. Student t-test results were corrected by an FDR test according to the Benjamini-Hochberg procedure, with an  $\alpha$  of  $< 0.05$ , significant p-values after FDR correction are depicted in red.
