# Supplementary material
Source: HighWire-hosted journal article supplement (https://gut.bmj.com/content/66/4/620)
Supplement: inline-supplementary-material-6 [file inline-supplementary-material-6.pdf]

**Table S5. Metabolic NMR integrals for all metabolites measured in liver expressed as mean and standard deviations with p-values for groups comparisons.**

# LKO-HFD vs LKO-CT

\* LKO-CT vs WT-CT

‡ vs WT-HFD

Metabolites highlighted in yellow are significantly different between groups

| ppm         | Metabolites                    | WT-CT          | LKO-CT         | WT-HFD         | LKO-HFD        | p-value   |      | 1vs2 | 1vs3  | 1vs4 | 2vs3  | 2vs4 | 3vs4  |
|-------------|--------------------------------|----------------|----------------|----------------|----------------|-----------|------|------|-------|------|-------|------|-------|
| 0,65 - 0,75 | Cholesterol                    | 4,40 ± 1,09    | 5,03 ± 1,33    | 3,89 ± 1,33    | 3,45 ± 1,70    | 0,04410   | #    | ,688 | ,799  | ,335 | ,198  | ,036 | 0,858 |
| 0,84 - 0,90 | FA-CH3 (VLDL1/ LDL1)           | 40,36 ± 6,18   | 38,50 ± 4,17   | 41,13 ± 5,38   | 44,46 ± 5,14   | 0,05850   | #    | ,823 | ,984  | ,240 | ,616  | ,039 | 0,419 |
| 0,92 - 0,94 | Isoleucine                     | 5,51 ± 1,00    | 5,36 ± 0,71    | 5,20 ± 1,03    | 4,61 ± 0,77    | 0,07980   |      | ,971 | ,811  | ,071 | ,970  | ,178 | 0,375 |
| 0,95 - 0,97 | 2-aminobutyrate                | 4,28 ± 0,63    | 4,65 ± 0,71    | 4,33 ± 0,70    | 4,39 ± 1,14    | 0,69088   |      | ,680 | ,998  | ,986 | ,776  | ,865 | 0,998 |
| 1,02 - 1,05 | Valine                         | 3,31 ± 0,68    | 3,69 ± 0,64    | 3,07 ± 0,68    | 2,99 ± 1,14    | 0,16231   |      | ,653 | ,885  | ,788 | ,246  | ,171 | 0,997 |
| 1,05 - 1,07 | 2-methylglutarate              | 1,30 ± 0,23    | 1,50 ± 0,30    | 1,16 ± 0,31    | 1,11 ± 0,46    | 0,03010   | #    | ,444 | ,760  | ,533 | ,076  | ,032 | 0,982 |
| 1,07 - 1,09 | 3-methyl-2-oxovalerate         | 1,27 ± 0,22    | 1,50 ± 0,32    | 1,12 ± 0,33    | 1,07 ± 0,46    | 0,01690   | #    | ,368 | ,731  | ,477 | ,050  | ,018 | 0,976 |
| 1,25 - 1,30 | FA (-CH2-)n (LDL2/ VLDL2)      | 174,55 ± 26,77 | 152,75 ± 28,61 | 185,20 ± 23,95 | 193,45 ± 43,29 | 0,01770   | #    | ,340 | ,842  | ,466 | ,071  | ,015 | 0,918 |
| 1,45 - 1,48 | Alanine                        | 4,78 ± 1,07    | 5,52 ± 0,80    | 4,23 ± 0,75    | 4,90 ± 1,86    | 0,08650   |      | ,438 | ,679  | ,994 | ,054  | ,590 | 0,525 |
| 1,54 - 1,64 | FA β-CH2                       | 43,62 ± 3,67   | 38,68 ± 5,81   | 45,15 ± 4,89   | 45,95 ± 7,46   | 0,01290   | #    | ,153 | ,909  | ,742 | ,035  | ,014 | 0,985 |
| 1,64 - 1,72 | Arginine                       | 6,92 ± 1,53    | 8,06 ± 1,34    | 7,21 ± 1,26    | 7,94 ± 2,66    | 0,33923   |      | ,415 | ,980  | ,509 | ,652  | ,999 | 0,747 |
| 1,80 - 1,84 | Glutaric acid monomethyl ester | 1,85 ± 0,53    | 2,34 ± 0,50    | 1,86 ± 0,49    | 2,12 ± 1,02    | 0,24656   |      | ,304 | 1,000 | ,760 | ,320  | ,863 | 0,778 |
| 1,91 - 1,92 | Acetate                        | 1,86 ± 0,42    | 2,17 ± 0,59    | 1,66 ± 0,47    | 1,77 ± 0,96    | 0,27295   |      | ,651 | ,879  | ,988 | ,239  | ,453 | 0,975 |
| 2,00 - 2,04 | FA=CH-CH2-CH2-                 | 36,62 ± 4,47   | 30,35 ± 6,09   | 30,26 ± 3,99   | 32,92 ± 7,50   | 0,02840   | *, ‡ | ,046 | ,042  | ,392 | 1,000 | ,687 | 0,664 |
| 2,04 - 2,06 | NAC1                           | 12,31 ± 1,26   | 10,93 ± 1,64   | 13,69 ± 1,56   | 13,50 ± 1,92   | 3,68 E-04 | #, ‡ | ,171 | ,170  | ,280 | ,001  | ,002 | 0,992 |
| 2,06 - 20,8 | NAC2                           | 14,42 ± 1,47   | 13,51 ± 1,80   | 18,28 ± 2,16   | 16,86 ± 2,20   | 5,33 E-07 | #, ‡ | ,660 | ,000  | ,017 | ,000  | ,001 | 0,29  |
| 2,22 - 2,27 | FA α-CH2                       | 29,62 ± 3,58   | 25,68 ± 4,43   | 31,35 ± 4,12   | 32,04 ± 6,92   | 0,01320   | #, ‡ | ,219 | ,826  | ,631 | ,035  | ,015 | 0,986 |
| 2,27 - 2,28 | Acetoacetate                   | 4,10 ± 0,69    | 3,44 ± 0,80    | 4,25 ± 1,00    | 3,84 ± 1,05    | 0,14984   |      | ,287 | ,978  | ,894 | ,139  | ,695 | 0,687 |
| 2,30 - 2,36 | Glutamate                      | 5,52 ± 1,14    | 5,97 ± 0,90    | 5,76 ± 0,67    | 6,35 ± 1,55    | 0,32478   |      | ,760 | ,951  | ,277 | ,969  | ,835 | 0,575 |

|             |                                               |              |              |              |              |           |      |       |       |       |      |      |       |
|-------------|-----------------------------------------------|--------------|--------------|--------------|--------------|-----------|------|-------|-------|-------|------|------|-------|
| 2,41 - 2,49 | Glutamine                                     | 2,97 ± 1,21  | 4,00 ± 1,03  | 3,43 ± 0,87  | 3,42 ± 1,67  | 0,25609   |      | ,189  | ,805  | ,810  | ,667 | ,661 | 1     |
| 2,53 - 2,54 | Citrate                                       | 0,44 ± 0,16  | 0,64 ± 0,20  | 0,44 ± 0,15  | 0,42 ± 0,22  | 0,01590   | #, * | ,047  | 1,000 | ,994  | ,057 | ,025 | 0,986 |
| 2,65 - 2,66 | Malate                                        | 0,21 ± 0,09  | 0,30 ± 0,08  | 0,24 ± 0,07  | 0,27 ± 0,14  | 0,18721   |      | ,154  | ,894  | ,548  | ,481 | ,846 | 0,923 |
| 2,74 - 2,78 | FA=CH-CH <sub>2</sub> -CH= (linoleic acid)    | 7,95 ± 1,12  | 8,01 ± 1,31  | 11,54 ± 1,40 | 11,00 ± 1,31 | 6,48 E-10 | #, ‡ | ,999  | ,000  | ,000  | ,000 | ,000 | 0,923 |
| 2,78 - 2,82 | FA=CH-CH <sub>2</sub> -CH= (arachidonic acid) | 5,78 ± 1,13  | 5,81 ± 0,75  | 7,98 ± 1,02  | 7,88 ± 1,15  | 1,32 E-07 | #, ‡ | 1,000 | ,000  | ,000  | ,000 | ,000 | 0,995 |
| 2,82 - 2,88 | FA=CH-CH <sub>2</sub> -CH= (omega-3)          | 5,34 ± 1,84  | 5,54 ± 1,17  | 7,61 ± 1,59  | 7,85 ± 1,71  | 1,71 E-04 | #, ‡ | ,990  | ,006  | ,002  | ,014 | ,005 | 0,984 |
| 3,03 - 3,04 | Creatinine                                    | 0,41 ± 0,15  | 0,58 ± 0,15  | 0,40 ± 0,13  | 0,45 ± 0,27  | 0,08748   |      | ,144  | ,998  | ,975  | ,101 | ,303 | 0,936 |
| 3,19 - 3,21 | Choline                                       | 1,32 ± 0,38  | 2,27 ± 0,87  | 1,91 ± 0,65  | 1,84 ± 1,08  | 0,04430   | *, ‡ | ,026  | ,281  | ,394  | ,026 | ,679 | 0,996 |
| 3,24 - 3,26 | Taurine                                       | 2,75 ± 0,87  | 4,34 ± 1,60  | 3,21 ± 1,03  | 3,13 ± 1,77  | 0,03950   | *    | ,032  | ,840  | ,899  | ,194 | ,149 | 1     |
| 3,26 - 3,27 | TMAO                                          | 3,24 ± 1,80  | 3,90 ± 1,18  | 2,94 ± 1,11  | 3,08 ± 1,76  | 0,41691   |      | ,700  | ,962  | ,994  | ,406 | ,540 | 0,996 |
| 3,30 - 3,36 | Proline                                       | 1,74 ± 0,58  | 3,12 ± 1,80  | 1,83 ± 0,59  | 2,06 ± 1,23  | 0,02150   | *, ‡ | ,029  | ,998  | ,908  | ,045 | ,133 | 0,962 |
| 3,37 - 3,39 | Glucose                                       | 2,58 ± 0,90  | 3,59 ± 1,35  | 2,42 ± 0,91  | 1,96 ± 1,05  | 0,00470   | #, ‡ | ,111  | ,982  | ,487  | ,048 | ,003 | 0,717 |
| 3,53 - 3,54 | Glycerol                                      | 0,49 ± 0,17  | 0,61 ± 0,19  | 0,43 ± 0,14  | 0,46 ± 0,24  | 0,11063   |      | ,382  | ,890  | ,982  | ,107 | ,208 | 0,986 |
| 3,54 - 3,55 | Glycine                                       | 0,46 ± 0,16  | 0,55 ± 0,16  | 0,40 ± 0,13  | 0,38 ± 0,20  | 0,06739   |      | ,541  | ,840  | ,624  | ,147 | ,066 | 0,981 |
| 3,79 - 3,81 | Fructose                                      | 2,47 ± 0,78  | 2,98 ± 0,92  | 2,15 ± 0,68  | 2,21 ± 1,21  | 0,13004   |      | ,536  | ,839  | ,902  | ,144 | ,191 | 0,999 |
| 3,92 - 3,93 | Creatine                                      | 1,40 ± 0,45  | 1,47 ± 0,44  | 1,05 ± 0,32  | 1,07 ± 0,59  | 0,04972   |      | ,980  | ,246  | ,289  | ,118 | ,144 | 1     |
| 3,93 - 3,94 | Creatine phosphate                            | 1,04 ± 0,40  | 1,13 ± 0,36  | 0,82 ± 0,23  | 0,82 ± 0,45  | 0,10896   |      | ,935  | ,477  | ,476  | ,191 | ,190 | 1     |
| 3,95 - 3,99 | Maltose                                       | 3,87 ± 1,60  | 4,26 ± 1,81  | 3,21 ± 0,99  | 2,84 ± 1,49  | 0,10519   |      | ,919  | ,707  | ,348  | ,330 | ,110 | 0,931 |
| 4,04 - 4,08 | Myo-inositol                                  | 2,98 ± 0,24  | 3,07 ± 0,22  | 3,17 ± 0,34  | 3,33 ± 0,33  | 0,03241   |      | ,882  | ,413  | ,025  | ,845 | ,135 | 0,51  |
| 4,10 - 4,14 | Lactate                                       | 3,85 ± 0,57  | 4,13 ± 0,44  | 3,54 ± 0,49  | 3,47 ± 0,75  | 0,02520   | #    | ,630  | ,542  | ,367  | ,067 | ,033 | 0,991 |
| 4,51 - 4,53 | Ascorbate                                     | 0,27 ± 0,12  | 0,38 ± 0,12  | 0,31 ± 0,09  | 0,27 ± 0,13  | 0,09071   |      | ,114  | ,854  | 1,000 | ,448 | ,126 | 0,875 |
| 4,55 - 4,60 | Glutathione                                   | 0,83 ± 0,37  | 1,13 ± 0,46  | 0,85 ± 0,29  | 0,70 ± 0,38  | 0,05350   | #    | ,228  | ,999  | ,827  | ,285 | ,037 | 0,756 |
| 5,26 - 5,38 | FA-CH=CH-                                     | 21,92 ± 3,18 | 19,18 ± 3,05 | 25,41 ± 2,66 | 24,12 ± 4,93 | 0,00060   | #, ‡ | ,252  | ,092  | ,438  | ,001 | ,008 | 0,812 |
| 5,40 - 5,44 | Glucogen                                      | 2,35 ± 1,09  | 2,33 ± 1,47  | 1,98 ± 0,64  | 1,64 ± 0,65  | 0,28645   |      | 1,000 | ,806  | ,333  | ,834 | ,363 | 0,851 |
| 7,14 - 7,18 | Tyrosine                                      | 0,16 ± 0,07  | 0,26 ± 0,08  | 0,17 ± 0,07  | 0,18 ± 0,12  | 0,02000   | *    | ,026  | ,970  | ,963  | ,076 | ,082 | 1     |
| 7,55 - 7,59 | Niacinamide                                   | 0,07 ± 0,07  | 0,16 ± 0,05  | 0,11 ± 0,05  | 0,12 ± 0,08  | 0,00960   | *    | ,005  | ,446  | ,292  | ,178 | ,295 | 0,991 |
