# Supplementary material
Source: HighWire-hosted journal article supplement (https://gut.bmj.com/content/66/4/620)
Supplement: inline-supplementary-material-8 [file inline-supplementary-material-8.pdf]

**Table S7A and S7B:** All differentially expressed genes between OBESE and NASH with a fold change greater than 2log +1 or below 2log -1 were loaded into the STRING 10 software. **A)** Top 10 KEGG pathways identified by the STRING program with corresponding genes. **B)** Top 10 GO-Biological Processes as identified by String program. (For further explanation see <http://string.embl.de/> )

**A**

| KEGG PATHWAY |                                                     | Number Of Genes | p-value bonferroni | GENES    |       |          |          |         |         |
|--------------|-----------------------------------------------------|-----------------|--------------------|----------|-------|----------|----------|---------|---------|
| 1100         | <i>Metabolic pathways</i>                           | 25              | 8.85E-9            | ACSS2    | SQLE  | ACAT2    | DHCR7    | CYP2C19 | LSS     |
|              |                                                     |                 |                    | MSMO1    | IDO2  | HMGCS1   | ACSL4    | FDFT1   | PLA2G2A |
|              |                                                     |                 |                    | FDPS     | IDI1  | P4HA1    | CYP51A1  | ME1     | TYMS    |
|              |                                                     |                 |                    | SDS      | ALDOC | CES1     | ELOVL6   | G6PC    | PSPH    |
|              |                                                     |                 |                    | HMGCR    |       |          |          |         |         |
| 100          | <i>Steroid biosynthesis</i>                         | 6               | 7.41E-8            | FDFT1    | MSMO1 | DHCR7    | CYP51A1  | LSS     | SQLE    |
| 900          | <i>Terpenoid backbone biosynthesis</i>              | 5               | 9.09E-6            | FDPS     | ACAT2 | HMGCR    | HMGCS1   | IDI1    |         |
| 1212         | <i>Fatty acid metabolism</i>                        | 6               | 2.12E-5            | FADS2    | ACAT2 | ACSL4    | SCD      | ELOVL6  | FADS1   |
| 3320         | <i>PPAR signaling pathway</i>                       | 6               | 1.76E-4            | FADS2    | ACSL4 | SCD      | ME1      | ANGPTL4 | FABP4   |
| 1040         | <i>Biosynthesis of unsaturated fatty acids</i>      | 4               | 6.2E-4             | FADS2    | SCD   | ELOVL6   | FADS1    |         |         |
| 1200         | <i>Carbon metabolism</i>                            | 6               | 1.92E-3            | ACSS2    | ALDOC | ACAT2    | ME1      | SDS     | PSPH    |
| 5330         | <i>Allograft rejection</i>                          | 4               | 4.6E-3             | HLA-DRB5 | HLA-C | HLA-DQA1 | HLA-DPB1 |         |         |
| 4940         | <i>Type I diabetes mellitus</i>                     | 4               | 8.88E-3            | HLA-DRB5 | HLA-C | HLA-DQA1 | HLA-DPB1 |         |         |
| 4672         | <i>Intestinal immune network for IgA production</i> | 4               | 1.3E-2             | HLA-DRB5 | HLA-C | HLA-DQA1 | HLA-DPB1 |         |         |

**B**

| Biological Processes |                                            | Number Of Genes | p-value bonferroni | GENES   |         |         |         |       |         |
|----------------------|--------------------------------------------|-----------------|--------------------|---------|---------|---------|---------|-------|---------|
| 6695                 | <i>cholesterol biosynthetic process</i>    | 11              | 8.79E-14           | MSMO1   | HMGCR   | HMGCS1  | CYP51A1 | SQLE  | IDI1    |
|                      |                                            |                 |                    | APOA4   | FDFT1   | FDPS    | DHCR7   | LSS   |         |
| 16126                | <i>sterol biosynthetic process</i>         | 11              | 4.32E-13           | MSMO1   | HMGCR   | HMGCS1  | CYP51A1 | SQLE  | IDI1    |
|                      |                                            |                 |                    | APOA4   | FDFT1   | FDPS    | DHCR7   | LSS   |         |
| 8203                 | <i>cholesterol metabolic process</i>       | 12              | 7.87E-10           | HMGCS1  | SQLE    | DHCR7   | MSMO1   | HMGCR | IDI1    |
|                      |                                            |                 |                    | APOA4   | FDFT1   | CYP51A1 | LSS     | FDPS  | CETP    |
| 8202                 | <i>steroid metabolic process</i>           | 15              | 9.78E-10           | HMGCS1  | DHCR7   | HMGCR   | CYP2C19 | FDFT1 | DHRS2   |
|                      |                                            |                 |                    | LSS     | FDPS    | CETP    | SQLE    | MSMO1 | IDI1    |
|                      |                                            |                 |                    | APOA4   | CYP51A1 | G6PC    |         |       |         |
| 6629                 | <i>lipid metabolic process</i>             | 26              | 1.37E-9            | DHRS2   | ABCB4   | SQLE    | ANGPTL4 | CTGF  | ACAT2   |
|                      |                                            |                 |                    | CYP51A1 | ME1     | HMGCR   | CETP    | APOA4 | CYP2C18 |
|                      |                                            |                 |                    | DHCR7   | CYP2C19 | LSS     | SCD     | FDPS  | IDI1    |
|                      |                                            |                 |                    | FADS2   | ACSL4   | FADS1   | PLA2G2A | FABP4 | ELOVL6  |
|                      |                                            |                 |                    | NPAS2   | G6PC    |         |         |       |         |
| 16125                | <i>sterol metabolic process</i>            | 12              | 2.6E-9             | HMGCS1  | SQLE    | DHCR7   | MSMO1   | HMGCR | IDI1    |
|                      |                                            |                 |                    | APOA4   | FDFT1   | CYP51A1 | LSS     | FDPS  | CETP    |
| 44283                | <i>small molecule biosynthetic process</i> | 17              | 7.82E-9            | HMGCS1  | FADS2   | DHCR7   | HMGCR   | ACSS2 | FADS1   |
|                      |                                            |                 |                    | FDFT1   | LSS     | SCD     | FDPS    | SDS   | SQLE    |
|                      |                                            |                 |                    | IDI1    | APOA4   | CYP51A1 | ELOVL6  | PSPH  |         |

|       |                                         |    |         |        |         |         |       |       |         |
|-------|-----------------------------------------|----|---------|--------|---------|---------|-------|-------|---------|
| 6694  | <i>steroid biosynthetic process</i>     | 11 | 1.45E-8 | HMGCS1 | SQLE    | DHCR7   | MSMO1 | HMGCR | IDI1    |
|       |                                         |    |         | APOA4  | FDFT1   | CYP51A1 | LSS   | FDPS  |         |
| 46165 | <i>alcohol biosynthetic process</i>     | 11 | 2.74E-8 | HMGCS1 | SQLE    | DHCR7   | MSMO1 | HMGCR | IDI1    |
|       |                                         |    |         | APOA4  | FDFT1   | CYP51A1 | LSS   | FDPS  |         |
| 44255 | <i>cellular lipid metabolic process</i> | 21 | 1.77E-7 | HMGCR  | ACSS2   | CETP    | ABCB4 | APOA4 | ANGPTL4 |
|       |                                         |    |         | CTGF   | CYP2C18 | FADS2   | ACSL4 | FADS1 | CYP2C19 |
|       |                                         |    |         | SCD    | PLA2G2A | FDPS    | IDI1  | FABP4 | ELOVL6  |
|       |                                         |    |         | NPAS2  | G6PC    | ME1     |       |       |         |
